# Supplementary material for: Bacterial versus non-bacterial infections: a methodology to support use-case-driven product development of diagnostics
Source: PubMed Central journal article supplement — BMJ Glob Health. 2020 Oct 21;5(10):e003141. doi: 10.1136/bmjgh-2020-003141 (PMC7580043; doi:10.1136/bmjgh-2020-003141), 2020-10-21
Supplement: bmjgh-2020-003141supp001.pdf [file bmjgh-2020-003141supp001.pdf]

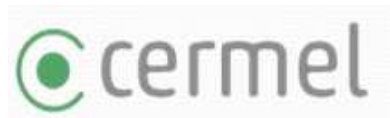

Case Report Form Clinic  
Biomarker evaluation study – AF\_01\_P08800-00  
Version 07MAR19

Place barcode label  
here

Clinic name: \_\_\_\_\_

Participant ID: FIND 00104 \_\_\_/\_\_\_/\_\_\_

## Case Report Form – Clinic

### ELIGIBILITY

|                                                                                                                                                                                                                               |                              |                             |
|-------------------------------------------------------------------------------------------------------------------------------------------------------------------------------------------------------------------------------|------------------------------|-----------------------------|
| 1. Age between 2 and 17 years old                                                                                                                                                                                             | <input type="checkbox"/> YES | <input type="checkbox"/> NO |
| 2. Temperature of $\geq 38^{\circ}\text{C}$ (oral or ear)/temperature of $\geq 37.5^{\circ}\text{C}$ (axillary or skin) at initial evaluation or within 6 hours of arrival to the hospital or history of fever within 7 days. | <input type="checkbox"/> YES | <input type="checkbox"/> NO |
| 3. Less than 7 days of symptoms                                                                                                                                                                                               | <input type="checkbox"/> YES | <input type="checkbox"/> NO |
| 4. Participant has no severe/life threatening illness *                                                                                                                                                                       | <input type="checkbox"/> YES | <input type="checkbox"/> NO |
| 5. Availability for a follow-up visit, if required                                                                                                                                                                            | <input type="checkbox"/> YES | <input type="checkbox"/> NO |

\* based on clinician assessment or the presence of any general signs of critical illness as defined by WHO guidelines (for children: extensive vomiting, active seizure or recent history of seizures, altered mentation, inability to feed, or any of the severe IMNCI classifications; for adults: impending airway obstruction, central cyanosis, severe respiratory distress, feeble pulse, active seizure or recent history of seizures, or unconsciousness)

### STUDY INCLUSION

|                                                                                     |                              |                             |                              |
|-------------------------------------------------------------------------------------|------------------------------|-----------------------------|------------------------------|
| 6. Based on the answers above is the participant eligible for the study? #          | <input type="checkbox"/> YES | <input type="checkbox"/> NO |                              |
| 7. Did the parent consent for the child to participate in the study?                | <input type="checkbox"/> YES | <input type="checkbox"/> NO |                              |
| 8. Did the adolescent (13-17 years old) give an assent to participate in the study? | <input type="checkbox"/> YES | <input type="checkbox"/> NO | <input type="checkbox"/> N/A |

# to be eligible, answers to Q1 to Q8 should all be "yes"

### DEMOGRAPHIC INFORMATION

|                                                                                                                                        |                                                       |
|----------------------------------------------------------------------------------------------------------------------------------------|-------------------------------------------------------|
| 9. Date of enrolment: ___(dd)/___(mm)/____(yyyy)                                                                                       |                                                       |
| 10. Sex: <input type="checkbox"/> Male <input type="checkbox"/> Female                                                                 |                                                       |
| 11. Place of enrolment: <input type="checkbox"/> OPD <input type="checkbox"/> Inpatient <input type="checkbox"/> Health Center         |                                                       |
| 12. Date of birth: ___(dd)/___(mm)/____(yyyy)                                                                                          | Age (years) <input type="text"/> <input type="text"/> |
| 13. Is the participant pregnant <input type="checkbox"/> Yes <input type="checkbox"/> No <input type="checkbox"/> N/A<br>*N/A for male |                                                       |

\*Offer test if requested

### CLINICAL HISTORY

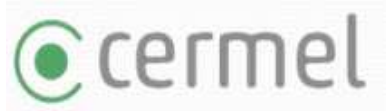

Case Report Form Clinic  
Biomarker evaluation study – AF\_01\_P08800-00  
Version 07MAR19

Place barcode label  
here

Clinic name: \_\_\_\_\_

Participant ID: FIND 00104 \_\_\_\_/\_\_\_\_

Tick all symptoms present as a part of current episode and estimate duration for each.

|     | SYMPTOMS                     | RESPONSE                     |                             |                                  | DURATION (in days)                |                                    |                                    |
|-----|------------------------------|------------------------------|-----------------------------|----------------------------------|-----------------------------------|------------------------------------|------------------------------------|
| 14. | Duration of illness          |                              |                             |                                  |                                   |                                    |                                    |
| 15. | Fever (days)                 | <input type="checkbox"/> YES | <input type="checkbox"/> NO |                                  |                                   |                                    |                                    |
| 16. | Redness of the eyes          | <input type="checkbox"/> YES | <input type="checkbox"/> NO |                                  |                                   |                                    |                                    |
| 17. | Eye discharge                | <input type="checkbox"/> YES | <input type="checkbox"/> NO |                                  |                                   |                                    |                                    |
| 18. | Sore Throat                  | <input type="checkbox"/> YES | <input type="checkbox"/> NO | <input type="checkbox"/> UNKNOWN |                                   |                                    |                                    |
| 19. | Ear discharge                | <input type="checkbox"/> YES | <input type="checkbox"/> NO |                                  |                                   |                                    |                                    |
| 20. | Swelling behind the ear      | <input type="checkbox"/> YES | <input type="checkbox"/> NO |                                  |                                   |                                    |                                    |
| 21. | Sneezing and rhinorrhoea     | <input type="checkbox"/> YES | <input type="checkbox"/> NO |                                  |                                   |                                    |                                    |
| 22. | Postnasal drip               | <input type="checkbox"/> YES | <input type="checkbox"/> NO |                                  |                                   |                                    |                                    |
| 23. | Cough                        | <input type="checkbox"/> YES | <input type="checkbox"/> NO |                                  | <input type="checkbox"/> <2 weeks | <input type="checkbox"/> <2 months | <input type="checkbox"/> ≥2 months |
| 24. | Chest pain                   | <input type="checkbox"/> YES | <input type="checkbox"/> NO | <input type="checkbox"/> Unknown | <input type="checkbox"/> <2 weeks | <input type="checkbox"/> <2 months | <input type="checkbox"/> ≥2 months |
| 25. | Diarrhoea                    | <input type="checkbox"/> YES | <input type="checkbox"/> NO |                                  |                                   |                                    |                                    |
| 26. | Vomiting                     | <input type="checkbox"/> YES | <input type="checkbox"/> NO |                                  |                                   |                                    |                                    |
| 27. | Pain while swallowing        | <input type="checkbox"/> YES | <input type="checkbox"/> NO | <input type="checkbox"/> UNKNOWN |                                   |                                    |                                    |
| 28. | Abdominal pain               | <input type="checkbox"/> YES | <input type="checkbox"/> NO | <input type="checkbox"/> UNKNOWN |                                   |                                    |                                    |
| 29. | Dysuria                      | <input type="checkbox"/> YES | <input type="checkbox"/> NO | <input type="checkbox"/> UNKNOWN |                                   |                                    |                                    |
| 30. | Urinary frequency or urgency | <input type="checkbox"/> YES | <input type="checkbox"/> NO | <input type="checkbox"/> UNKNOWN |                                   |                                    |                                    |
| 31. | Rash                         | <input type="checkbox"/> YES | <input type="checkbox"/> NO |                                  |                                   |                                    |                                    |
| 32. | Headache                     | <input type="checkbox"/> YES | <input type="checkbox"/> NO | <input type="checkbox"/> UNKNOWN |                                   |                                    |                                    |
| 33. | Neck stiffness               | <input type="checkbox"/> YES | <input type="checkbox"/> NO | <input type="checkbox"/> UNKNOWN |                                   |                                    |                                    |
| 34. | Photophobia                  | <input type="checkbox"/> YES | <input type="checkbox"/> NO | <input type="checkbox"/> UNKNOWN |                                   |                                    |                                    |
| 35. | Joint pain or swelling       | <input type="checkbox"/> YES | <input type="checkbox"/> NO | <input type="checkbox"/> UNKNOWN |                                   |                                    |                                    |
| 36. | Other (please specify)       | <input type="checkbox"/> YES | <input type="checkbox"/> NO |                                  |                                   |                                    |                                    |
| 37. | _____                        |                              |                             |                                  |                                   |                                    |                                    |
| 38. | _____                        |                              |                             |                                  |                                   |                                    |                                    |

**\*all yes must have duration**

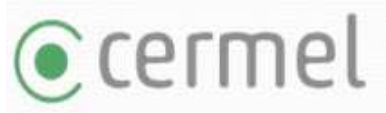

Case Report Form Clinic  
Biomarker evaluation study – AF\_01\_P08800-00  
Version 07MAR19

Place barcode label  
here

Clinic name: \_\_\_\_\_

Participant ID: FIND 00104 \_\_/\_\_/\_\_\_\_

### TREATMENT HISTORY

|     |                                                                                                                                                |                                                                                                                                                          |                                         |                                     |
|-----|------------------------------------------------------------------------------------------------------------------------------------------------|----------------------------------------------------------------------------------------------------------------------------------------------------------|-----------------------------------------|-------------------------------------|
| 39. | Has the participant taken antibiotics?                                                                                                         | If Yes:                                                                                                                                                  | 40. Treatment start date:<br>__/__/____ | <input type="checkbox"/> Don't know |
|     | <input type="checkbox"/> YES<br><input type="checkbox"/> NO<br><input type="checkbox"/> Don't know                                             |                                                                                                                                                          | 41. Treatment end date:<br>__/__/____   | <input type="checkbox"/> Don't know |
| 42. | Has the participant taken antipyretics                                                                                                         | If yes                                                                                                                                                   | 43. Treatment start date:<br>__/__/____ | <input type="checkbox"/> Don't know |
|     | <input type="checkbox"/> YES<br><input type="checkbox"/> NO<br><input type="checkbox"/> Don't know                                             |                                                                                                                                                          | 44. Treatment end date:<br>__/__/____   | <input type="checkbox"/> Don't know |
| 45. | Has the participant taken any other treatment?<br><input type="checkbox"/> YES <input type="checkbox"/> NO <input type="checkbox"/> Don't know | 46. If Yes (tick one or several):<br><input type="checkbox"/> Antimalarial <input type="checkbox"/> Antipyretic <input type="checkbox"/> Other, specify: |                                         |                                     |

### PAST MEDICAL HISTORY

|     |                                                                                                                                              |                                                                                                                                                                                        |
|-----|----------------------------------------------------------------------------------------------------------------------------------------------|----------------------------------------------------------------------------------------------------------------------------------------------------------------------------------------|
| 47. | Does the participant have a chronic disease:<br><input type="checkbox"/> YES <input type="checkbox"/> NO <input type="checkbox"/> Don't know | 48. If Yes (tick one or several):<br><input type="checkbox"/> DM <input type="checkbox"/> HIV <input type="checkbox"/> TB<br><input type="checkbox"/> Other chronic diseases, specify: |
|-----|----------------------------------------------------------------------------------------------------------------------------------------------|----------------------------------------------------------------------------------------------------------------------------------------------------------------------------------------|

***\*if all yes must have follow up questions answered***

### VACCINATION HISTORY

|     |                                                       |                                                |                                               |
|-----|-------------------------------------------------------|------------------------------------------------|-----------------------------------------------|
| 49. | Has the participant been vaccinated according to EPI? | <input type="checkbox"/> Completed vaccination | <input type="checkbox"/> Partially vaccinated |
|     |                                                       | <input type="checkbox"/> Not vaccinated        | <input type="checkbox"/> Don't know           |

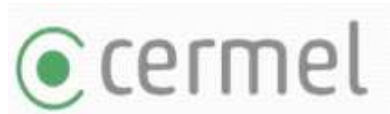

Case Report Form Clinic  
Biomarker evaluation study – AF\_01\_P08800-00  
Version 07MAR19

Place barcode label  
here

Clinic name: \_\_\_\_\_

Participant ID: FIND 00104\_\_/\_/\_\_\_\_

## PHYSICAL EXAMINATION

### VITAL SIGNS

#### 50. GENERAL APPEARANCE *\*all questions must have response recorded*

- Not ill *Healthy and strong impression throughout examination*
- Moderately ill *Some impairment of activities, mostly self-sufficient but clearly symptomatic*
- Acutely ill *Unable to carry out usual activities, visibly distressed, high fever, prostrated*
- Chronically ill *Prominent facial bones (for adults), Emaciated with bone and skin appearance*

51. Temperature (°C)      Axillary  Oral  Ear  Skin

52. Respiratory rate (per minute)

53. Pulse rate (per minute)

54. Blood pressure (mmHg) \_\_\_\_\_

### ANTHROPOMETRY

55. Weight (Kg)

56. Height (cm)

57. Mid upper arm circumference (cm)  
(optional)

58. Peripheral signs of malnutrition  
(tick one or several)  No signs  Hair colour change  Oedema  Skin lesions

### SYSTEMIC EXAMINATION

If Yes, tick one or several:

|                           |                                                             |                                                                                                                                                  |                                                                                                                                                                    |
|---------------------------|-------------------------------------------------------------|--------------------------------------------------------------------------------------------------------------------------------------------------|--------------------------------------------------------------------------------------------------------------------------------------------------------------------|
| 59. <b>HEENT</b>          | <input type="checkbox"/> Yes<br><input type="checkbox"/> No | <input type="checkbox"/> Pharyngeal erythema<br><input type="checkbox"/> Pharyngeal enlargement<br><input type="checkbox"/> Conjunctival exudate | <input type="checkbox"/> Conjunctival redness<br><input type="checkbox"/> Pain and swelling around teeth                                                           |
| 60. <b>Lungs</b>          | <input type="checkbox"/> Yes<br><input type="checkbox"/> No | <input type="checkbox"/> Fast breathing<br><input type="checkbox"/> Decreased air entry<br><input type="checkbox"/> Retractions                  | <input type="checkbox"/> Dullness<br><input type="checkbox"/> Crepitation<br><input type="checkbox"/> Chest in drawing<br><input type="checkbox"/> Other, Specify: |
| 61. <b>Heart</b>          | <input type="checkbox"/> Yes<br><input type="checkbox"/> No | <input type="checkbox"/> Tachycardia                                                                                                             | <input type="checkbox"/> Ejection murmur<br><input type="checkbox"/> Other, Specify:                                                                               |
| 62. <b>Abdomen</b>        | <input type="checkbox"/> Yes<br><input type="checkbox"/> No | <input type="checkbox"/> Tenderness<br><input type="checkbox"/> Hepatomegaly                                                                     | <input type="checkbox"/> Splenomegaly<br><input type="checkbox"/> Fluid Collection<br><input type="checkbox"/> Other, specify:                                     |
| 63. <b>Genitourinary</b>  | <input type="checkbox"/> Yes<br><input type="checkbox"/> No | <input type="checkbox"/> Costovertebral angle tenderness                                                                                         | <input type="checkbox"/> Other, specify:                                                                                                                           |
| 64. <b>Nervous System</b> | <input type="checkbox"/> Yes<br><input type="checkbox"/> No | <input type="checkbox"/> Positive meningeal signs<br><input type="checkbox"/> Focal neurologic deficit                                           | <input type="checkbox"/> Other, Specify:                                                                                                                           |

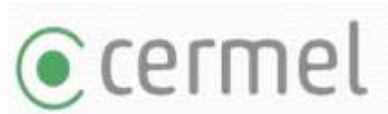

Case Report Form Clinic  
Biomarker evaluation study – AF\_01\_P08800-00  
Version 07MAR19

Place barcode label  
here

Clinic name: \_\_\_\_\_

Participant ID: FIND 00104 \_\_ \_\_ / \_\_ \_\_ \_\_ \_\_

|                            |                                                             |                                                                             |                                                                                                    |                                          |
|----------------------------|-------------------------------------------------------------|-----------------------------------------------------------------------------|----------------------------------------------------------------------------------------------------|------------------------------------------|
| 65. <b>Integumentary</b>   | <input type="checkbox"/> Yes<br><input type="checkbox"/> No | <input type="checkbox"/> Maculopapular<br><input type="checkbox"/> Impetigo | <input type="checkbox"/> Cellulitis/abscess >5mm<br><input type="checkbox"/> Dermatovesicular rash | <input type="checkbox"/> Other, specify: |
| 66. <b>Lymphadenopathy</b> | <input type="checkbox"/> Yes<br><input type="checkbox"/> No | If yes, specify location: _____<br>size: _____ mm                           |                                                                                                    |                                          |
| 67. <b>Joint Swelling</b>  | <input type="checkbox"/> Yes<br><input type="checkbox"/> No | If yes, specify location: _____                                             |                                                                                                    |                                          |
| 68. <b>Other findings</b>  | <input type="checkbox"/> Yes<br><input type="checkbox"/> No | <input type="checkbox"/> If yes, specify: _____                             |                                                                                                    |                                          |

**If yes follow up questions must be answered**

#### RAPID TESTS

|                             |                                                                               |                                                                                |                                                                           |
|-----------------------------|-------------------------------------------------------------------------------|--------------------------------------------------------------------------------|---------------------------------------------------------------------------|
| 69. Strep A RDT with Ths002 | <input type="checkbox"/> Positive<br><input type="checkbox"/> N/A             | <input type="checkbox"/> Negative                                              | <input type="checkbox"/> Invalid                                          |
| 70. Malaria RDT             | <input type="checkbox"/> Pf positive                                          | <input type="checkbox"/> Pan positive                                          | <input type="checkbox"/> Negative<br><input type="checkbox"/> Invalid     |
| 71. CRP/Malaria RDT         | <input type="checkbox"/> Pf positive<br><input type="checkbox"/> CRP positive | <input type="checkbox"/> Pan positive<br><input type="checkbox"/> CRP Negative | <input type="checkbox"/> Negative<br><input type="checkbox"/> CRP Invalid |

**70-71 must be done for all patients**

#### CHEST X-RAY

|                                                                     |                                                                                                                                                                                                                                                                                                         |
|---------------------------------------------------------------------|---------------------------------------------------------------------------------------------------------------------------------------------------------------------------------------------------------------------------------------------------------------------------------------------------------|
| 72. Chest X-Ray performed                                           | <input type="checkbox"/> YES<br><input type="checkbox"/> NO<br><input type="checkbox"/> N/A                                                                                                                                                                                                             |
| 73. Date :                                                          | __ __ (dd) / __ __ (mm) / __ __ __ __ (yyyy)                                                                                                                                                                                                                                                            |
| 74. Normal                                                          | <input type="checkbox"/> YES<br><input type="checkbox"/> NO                                                                                                                                                                                                                                             |
| 75. Localization of abnormality (optional)<br>(tick one or several) | <input type="checkbox"/> Left upper zone<br><input type="checkbox"/> Right upper zone<br><input type="checkbox"/> Diffuse<br><input type="checkbox"/> Left mid zone<br><input type="checkbox"/> Right mid zone<br><input type="checkbox"/> Left lower zone<br><input type="checkbox"/> Right lower zone |
| 76. Picture (optional)<br>(tick one or several)                     | <input type="checkbox"/> Infiltrate consolidation<br><input type="checkbox"/> Mediastinal/hilar lymphadenopathy<br><input type="checkbox"/> Cavitary lesion<br><input type="checkbox"/> Micronodules (Miliary)<br><input type="checkbox"/> Tuberculoma<br><input type="checkbox"/> Pleural effusion     |
| 77. Principal conclusion:<br>(tick one only)                        | <input type="checkbox"/> Bacterial pneumonia likely<br><input type="checkbox"/> Other: _____<br><input type="checkbox"/> Pneumonia or atypical TB<br><input type="checkbox"/> Pneumonia unlikely, TB likely                                                                                             |

**If yes for question 72, 73-77 must be completed**

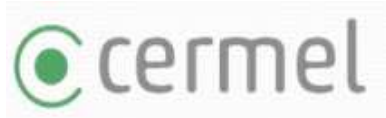

Case Report Form Clinic  
Biomarker evaluation study – AF\_01\_P08800-00  
Version 07MAR19

Place barcode label  
here

Clinic name: \_\_\_\_\_

Participant ID: FIND 00104 \_\_ \_\_ / \_\_ \_\_ \_\_ \_\_

### PRESUMED DIAGNOSIS TREATMENT

|                                                                 |                                                                                                                                                                                                                                                                                                                                                                                                                                                                                                                                                                                                                                                                                                                                                                                                                                                                                                                                                                                                                                                                                                                                                                                                                          |                                                                                                           |
|-----------------------------------------------------------------|--------------------------------------------------------------------------------------------------------------------------------------------------------------------------------------------------------------------------------------------------------------------------------------------------------------------------------------------------------------------------------------------------------------------------------------------------------------------------------------------------------------------------------------------------------------------------------------------------------------------------------------------------------------------------------------------------------------------------------------------------------------------------------------------------------------------------------------------------------------------------------------------------------------------------------------------------------------------------------------------------------------------------------------------------------------------------------------------------------------------------------------------------------------------------------------------------------------------------|-----------------------------------------------------------------------------------------------------------|
| 78. Presumed diagnosis by the clinician: <i>(tick one only)</i> | <input type="checkbox"/> Bacterial infection<br><input type="checkbox"/> Viral infection<br><input type="checkbox"/> Malarial infection<br><input type="checkbox"/> Parasitic infection<br><input type="checkbox"/> Multiple infection<br><input type="checkbox"/> Don't know                                                                                                                                                                                                                                                                                                                                                                                                                                                                                                                                                                                                                                                                                                                                                                                                                                                                                                                                            | <input type="checkbox"/> Non-infectious illness, specify:<br><br><input type="checkbox"/> Other, specify: |
| 79. Hospitalization?                                            | <input type="checkbox"/> Yes <input type="checkbox"/> No <input type="checkbox"/> Don't know                                                                                                                                                                                                                                                                                                                                                                                                                                                                                                                                                                                                                                                                                                                                                                                                                                                                                                                                                                                                                                                                                                                             |                                                                                                           |
| 80. Treatment Prescribed:                                       | <input type="checkbox"/> Yes <input type="checkbox"/> No <input type="checkbox"/> Don't know<br>81. If Yes, specify treatment: <i>(tick one or several)</i><br>If Antibiotics, tick the box: <ul style="list-style-type: none"> <li><input type="checkbox"/> Penicillin</li> <li><input type="checkbox"/> Cloxacillin</li> <li><input type="checkbox"/> Ampicillin</li> <li><input type="checkbox"/> Amoxi/clavulan</li> <li><input type="checkbox"/> Ceftriaxon</li> <li><input type="checkbox"/> Gentamycin</li> <li><input type="checkbox"/> Doxycyclin</li> <li><input type="checkbox"/> Ciprofloxacin</li> <li><input type="checkbox"/> Chloramphenicol</li> <li><input type="checkbox"/> Clindamycin</li> <li><input type="checkbox"/> Erythromycin</li> <li><input type="checkbox"/> Cotrimoxazole</li> <li><input type="checkbox"/> Azithomycin</li> <li><input type="checkbox"/> Tetracyclin</li> <li><input type="checkbox"/> Cefoxitin</li> </ul> <ul style="list-style-type: none"> <li><input type="checkbox"/> Supportive care</li> <li><input type="checkbox"/> Antimalarial, specify:</li> <li><input type="checkbox"/> Antiviral, specify:</li> <li><input type="checkbox"/> Other, specify:</li> </ul> |                                                                                                           |

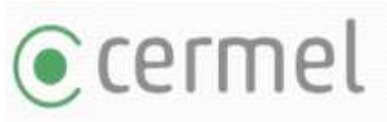

Case Report Form Clinic  
Biomarker evaluation study – AF\_01\_P08800-00  
Version 07MAR19

Place barcode label  
here

Clinic name: \_\_\_\_\_

Participant ID: FIND 00104 \_\_/\_\_/\_\_\_\_

|                                              |                                                          |
|----------------------------------------------|----------------------------------------------------------|
| 82. Withdrawal or early exclusion from study | <input type="checkbox"/> Yes <input type="checkbox"/> No |
| If Yes, specify reason:                      |                                                          |

Comments: \_\_\_\_\_

\_\_\_\_\_

Investigator's Signature: \_\_\_\_\_ Date completion: \_\_/\_\_/\_\_\_\_

First data entry: \_\_\_\_\_ Date completion: \_\_/\_\_/\_\_\_\_

Second data entry: \_\_\_\_\_ Date completion: \_\_/\_\_/\_\_\_\_

\_\_\_\_\_

Copy CRF sent Date: \_\_/\_\_/\_\_\_\_

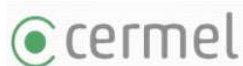

FIND – Biomarker evaluation study / AF\_01\_P08800-00  
Version 07MAR19

Participant ID: FIND 00104 \_\_\_/\_\_\_/\_\_\_

Place barcode label  
here

Investigator initials \_\_\_\_\_

Patient Age in years \_\_\_\_\_ Sample volume collected EDTA \_\_\_\_\_

## Clinical laboratory CRF enrolment visit

**Investigator:** Please “standard panel” will be run for all participants

**Transporter:** Please check all documents and confirm receipt of samples as requested

**Lab scientist:** 1. Please tick/note the results at the appropriate place.

| INVESTIGATOR REQUEST |                                     | TRANSPORTATION CHECK | BARCODE      |                          |
|----------------------|-------------------------------------|----------------------|--------------|--------------------------|
| STANDARD PANEL       | <input checked="" type="checkbox"/> | 1 EDTA tube          | ED WB COL002 | <input type="checkbox"/> |
| NO FOCUS PANEL       | <input type="checkbox"/>            | Same EDTA tube       |              |                          |

2. If patient is HIV+ve by RDT add NO FOCUS panel RDT testing

| Laboratory tests                                           | Result                                                                                                                                                                        |
|------------------------------------------------------------|-------------------------------------------------------------------------------------------------------------------------------------------------------------------------------|
| HIV RDT* If HIV +ve complete NO FOCUS panel RDTs           | <input type="checkbox"/> Positive <input type="checkbox"/> Negative <input type="checkbox"/> Invalid                                                                          |
| Malaria Microscopy results <b>reader 1</b><br>Reader _____ | <input type="checkbox"/> Positive <input type="checkbox"/> Pf <input type="checkbox"/> Po <input type="checkbox"/> PM <input type="checkbox"/> Negative    Density____para/μL |
|                                                            | <input type="checkbox"/> Positive <input type="checkbox"/> Pf <input type="checkbox"/> Po <input type="checkbox"/> PM <input type="checkbox"/> Negative    Density____para/μL |
| Malaria Microscopy results <b>reader 2</b><br>Reader _____ | <input type="checkbox"/> Positive <input type="checkbox"/> Pf <input type="checkbox"/> Po <input type="checkbox"/> PM <input type="checkbox"/> Negative    Density____para/μL |
|                                                            | <input type="checkbox"/> Positive <input type="checkbox"/> Pf <input type="checkbox"/> Po <input type="checkbox"/> PM <input type="checkbox"/> Negative    Density____para/μL |
| Malaria Microscopy results <b>reader 3</b><br>Reader _____ | <input type="checkbox"/> Positive <input type="checkbox"/> Pf <input type="checkbox"/> Po <input type="checkbox"/> PM <input type="checkbox"/> Negative    Density____para/μL |
|                                                            | <input type="checkbox"/> Positive <input type="checkbox"/> Pf <input type="checkbox"/> Po <input type="checkbox"/> PM <input type="checkbox"/> Negative    Density____para/μL |
| Haematology full blood count                               | WBC(x10 <sup>3</sup> /μL):____ Hct(%):____ LY(%):____ NEU(%):____<br>(optional):____                                                                                          |
| <b>NO FOCUS if HIV +ve</b>                                 | <input type="checkbox"/>                                                                                                                                                      |
| No focus panel                                             | <input type="checkbox"/> Done <input type="checkbox"/> Not done                                                                                                               |
| Cryptococcus                                               | <input type="checkbox"/> Positive <input type="checkbox"/> Negative <input type="checkbox"/> Invalid                                                                          |
| Syphilis                                                   | <input type="checkbox"/> Positive <input type="checkbox"/> Negative <input type="checkbox"/> Invalid                                                                          |



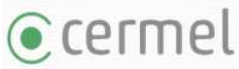

FIND – Biomarker evaluation study / AF\_01\_P08800-00  
Version 07MAR19

Participant ID: FIND 00104 \_\_/\_\_/\_\_\_\_

Place barcode label here

**Comments:** \_\_\_\_\_

**Laboratory scientist name:** \_\_\_\_\_

Date completion: \_\_/\_\_/\_\_\_\_

**Final data entry:** \_\_\_\_\_

Date completion: \_\_/\_\_/\_\_\_\_

Copy CRF sent

Date: \_\_/\_\_/\_\_\_\_

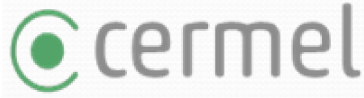

IND – Biomarker evaluation study / AF\_01\_P08800-00  
Version 07MAR19

Place barcode label  
here

Clinic name: \_\_\_\_\_

Participant ID: FIND 00104 \_\_\_\_/\_\_\_\_/\_\_\_\_

## Case Report Form – Follow up

### Treatment History between Initial Evaluation

|                                                                                                                              |                                                                    |                                                                                                                                                                                                                                                                |
|------------------------------------------------------------------------------------------------------------------------------|--------------------------------------------------------------------|----------------------------------------------------------------------------------------------------------------------------------------------------------------------------------------------------------------------------------------------------------------|
| <p>1. Has the participant taken antibiotics?<br/><input type="checkbox"/> NO<br/><input type="checkbox"/> Don't know</p>     | <p><input type="checkbox"/> YES →<br/>If yes specify<br/>_____</p> | <p>2. Treatment start date: _____<br/><input type="checkbox"/> Don't know</p> <p>3. Treatment end date: _____<br/><input type="checkbox"/> Don't know</p> <p>4. Participant was considered cured: <input type="checkbox"/> YES <input type="checkbox"/> NO</p> |
| <p>5. Has the participant taken any other treatment?<br/><input type="checkbox"/> NO <input type="checkbox"/> Don't know</p> | <p><input type="checkbox"/> YES →</p>                              | <p>6. <input type="checkbox"/> Antimalarial<br/><input type="checkbox"/> Antipyretic<br/><input type="checkbox"/> Other, specify: _____</p>                                                                                                                    |

### Follow up Clinical Assessment

|                                                                                                                                                                                                                                                                                                             |                              |                             |                                     |
|-------------------------------------------------------------------------------------------------------------------------------------------------------------------------------------------------------------------------------------------------------------------------------------------------------------|------------------------------|-----------------------------|-------------------------------------|
| 7. Has the fever gone ?                                                                                                                                                                                                                                                                                     | <input type="checkbox"/> YES | <input type="checkbox"/> NO | <input type="checkbox"/> Don't know |
| 8. If yes to #5, how many days after initiation of treatment?                                                                                                                                                                                                                                               | _____                        |                             |                                     |
| 9. Are there any additional symptoms?                                                                                                                                                                                                                                                                       | <input type="checkbox"/> YES | <input type="checkbox"/> NO | <input type="checkbox"/> Don't know |
| 10. If yes, what is the type of symptoms?                                                                                                                                                                                                                                                                   |                              |                             |                                     |
| <input type="checkbox"/> Respiratory<br><input type="checkbox"/> Gastrointestinal<br><input type="checkbox"/> Fever without focus<br><input type="checkbox"/> Rash<br><input type="checkbox"/> Urinary tract<br><input type="checkbox"/> Arthritis<br><input type="checkbox"/> Other, please specify: _____ |                              |                             |                                     |

### Final Clinical Diagnosis

|                                  |                                                                                                                                                                                                                                                             |                                                                                                                                                      |             |
|----------------------------------|-------------------------------------------------------------------------------------------------------------------------------------------------------------------------------------------------------------------------------------------------------------|------------------------------------------------------------------------------------------------------------------------------------------------------|-------------|
| 11. Presumptive Diagnosis:       | <ul style="list-style-type: none"> <li><input type="checkbox"/> Bacterial infection</li> <li><input type="checkbox"/> Viral infection</li> <li><input type="checkbox"/> Parasitic infection</li> <li><input type="checkbox"/> Multiple infection</li> </ul> | <input type="checkbox"/> Non-infectious illness, specify:<br><br><input type="checkbox"/> Other, specify:<br><br><input type="checkbox"/> Don't know |             |
| 12. Date Diagnosis (dd/mm/yyyy): | ____/____/____                                                                                                                                                                                                                                              |                                                                                                                                                      |             |
| 13. Patient found:               | <input type="checkbox"/> Alive                                                                                                                                                                                                                              | <input type="checkbox"/> Dead                                                                                                                        | Note: _____ |

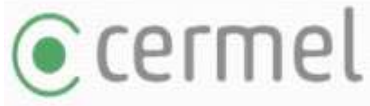

IND – Biomarker evaluation study / AF\_01\_P08800-00  
Version 07MAR19

Place barcode label  
here

Clinic name: \_\_\_\_\_

Participant ID: FIND 00104 \_\_/\_\_/\_\_\_\_\_

\_\_\_\_\_

**Investigator's Signature:** \_\_\_\_\_ Date completion: \_\_/\_\_/\_\_\_\_\_

**First data entry:** \_\_\_\_\_ Date completion: \_\_/\_\_/\_\_\_\_\_

\_\_\_\_\_

\_\_\_\_\_

**Second data entry:** \_\_\_\_\_ Date completion: \_\_/\_\_/\_\_\_\_\_

\_\_\_\_\_

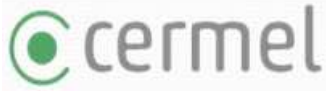

FIND – Biomarker evaluation study / HOF\_01\_P08800-00

Version 07MAR19

Participant ID: FIND 00104 \_\_\_/\_\_\_

Place barcode label  
here

## Microbiology Laboratory CRF enrolment visit

Investigator initials: \_\_\_\_\_

Investigator: Please tick/mark the required tests on the form, “standard panel” will be run for all participants.

Transporter: Please check all documents and confirm receipt of samples as requested

Lab scientist: Please confirm receipt of samples and tick/note the results at the appropriate place

| INVESTIGATOR REQUEST |                                     | TRANSPORTATION CHECK                     | BARCODE         |                          |
|----------------------|-------------------------------------|------------------------------------------|-----------------|--------------------------|
| STANDARD PANEL       | <input checked="" type="checkbox"/> | Blood culture bottle *1                  | BCCOL001        | <input type="checkbox"/> |
| Urine for Storage    | <input checked="" type="checkbox"/> | Container                                | U001            | <input type="checkbox"/> |
| URINARY PANEL*       | <input type="checkbox"/>            | Urine sample                             | UCOL001         | <input type="checkbox"/> |
| STOOL PANEL~         | <input type="checkbox"/>            | Stool sample * 1 – split in parasitology | Patient ID only | <input type="checkbox"/> |
| CNS PANEL            | <input type="checkbox"/>            | CSF sample                               | CSF001          | <input type="checkbox"/> |
| SKIN/JOINT/ASPIRATE  | <input type="checkbox"/>            | Other sample/S                           | OT              | <input type="checkbox"/> |
| Transported by       |                                     |                                          | Received by     |                          |

| INVESTIGATOR REQUEST |                          | TRANSPORTATION CHECK | BARCODE     |                          |
|----------------------|--------------------------|----------------------|-------------|--------------------------|
| RESPIRATORY PANEL    | <input type="checkbox"/> | Urine                |             | <input type="checkbox"/> |
| Transported by       |                          |                      | Received by |                          |

| Laboratory tests | Results                                                                                                                                                                                                                                                                                                                                                                                                                                                                                                                                                                             |
|------------------|-------------------------------------------------------------------------------------------------------------------------------------------------------------------------------------------------------------------------------------------------------------------------------------------------------------------------------------------------------------------------------------------------------------------------------------------------------------------------------------------------------------------------------------------------------------------------------------|
| STANDARD PANEL   | <b>Time and date of blood collection:</b><br><b>Tubes collected:</b> Aerobic <input type="checkbox"/>                                                                                                                                                                                                                                                                                                                                                                                                                                                                               |
| Blood culture    | <input type="checkbox"/> Positive <input type="checkbox"/> Negative <input type="checkbox"/> Contamination<br>If culture positive, specify Gram staining results:<br><input type="checkbox"/> Gram positive <input type="checkbox"/> Gram negative <input type="checkbox"/> Rods <input type="checkbox"/> Cocci <input type="checkbox"/> No pathogen observed,<br><input type="checkbox"/> Pathogen isolated<br>Pathogen: <input type="checkbox"/> E.coli <input type="checkbox"/> kleb pneu <input type="checkbox"/> Staph aur <input type="checkbox"/> Salmonella<br>Other: _____ |

| DIARRHEAL PANEL | Results                                                                                                                                |
|-----------------|----------------------------------------------------------------------------------------------------------------------------------------|
| Faeces culture  | <b>Time and date of stool collection:</b><br>Pathogen isolated: <input type="checkbox"/> No <input type="checkbox"/> Yes specify _____ |

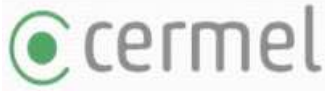

FIND – Biomarker evaluation study / HOF\_01\_P08800-00

Version 07MAR19

Participant ID: FIND 00104 \_\_\_/\_\_\_/\_\_\_

Place barcode label  
here

|                                                     |                                                                                                                                                                                                                                                                                                                                                                                                                                        |                                   |
|-----------------------------------------------------|----------------------------------------------------------------------------------------------------------------------------------------------------------------------------------------------------------------------------------------------------------------------------------------------------------------------------------------------------------------------------------------------------------------------------------------|-----------------------------------|
| <b>URINARY PANEL</b>                                | <b>Aliquot 2 tubes of 1 mL and store at -80°C (research lab), ensure collection of at least 40ml if additional tests required</b><br>1 Urine sample <input type="checkbox"/>                                                                                                                                                                                                                                                           | U COL001 <input type="checkbox"/> |
| Urine dipstick (combu 9)                            | WBC: <input type="checkbox"/> Positive <input type="checkbox"/> Negative <input type="checkbox"/> Invalid<br>Nitrites: <input type="checkbox"/> Positive <input type="checkbox"/> Negative <input type="checkbox"/> Invalid                                                                                                                                                                                                            |                                   |
| Urine Culture                                       | <input type="checkbox"/> Positive <input type="checkbox"/> Negative <input type="checkbox"/> Contamination<br>If positive specify pathogen isolated<br><input type="checkbox"/> E.coli <input type="checkbox"/> Proteus <input type="checkbox"/> Pseudo <input type="checkbox"/> Entero <input type="checkbox"/> Staph <input type="checkbox"/> Strep <input type="checkbox"/><br>S.saprophyticus <input type="checkbox"/> Other _____ |                                   |
| <b>RESPIRATORY PANEL</b> <input type="checkbox"/>   | <b>Use urine for this panel</b>                                                                                                                                                                                                                                                                                                                                                                                                        |                                   |
| <i>S. pneumoniae</i> RDT (urine)                    | <input type="checkbox"/> Positive <input type="checkbox"/> Negative <input type="checkbox"/> Invalid                                                                                                                                                                                                                                                                                                                                   |                                   |
| <b>CNS PANEL</b> <input type="checkbox"/>           | <b>Time and date of CSF collection:</b>                                                                                                                                                                                                                                                                                                                                                                                                |                                   |
| CSF Examination                                     | Grossly looks: <input type="checkbox"/> Crystal clear <input type="checkbox"/> Turbid <input type="checkbox"/> Bloody<br>Cells ( per mm3): _____ Neutrophil (%): _____<br>Protein: _____ mg/dL Glucose: _____ mg/dL                                                                                                                                                                                                                    |                                   |
| Cryptococcus RDT (CSF)                              | <input type="checkbox"/> Positive <input type="checkbox"/> Negative <input type="checkbox"/> Invalid                                                                                                                                                                                                                                                                                                                                   |                                   |
| <i>S. pneumoniae</i> RDT (CSF)                      | <input type="checkbox"/> Positive <input type="checkbox"/> Negative <input type="checkbox"/> Invalid                                                                                                                                                                                                                                                                                                                                   |                                   |
| Gram stain                                          | <input type="checkbox"/> Not done <input type="checkbox"/> Pathogen observed <input type="checkbox"/> No pathogen observed<br>If pathogen observed ( <i>tick one of several</i> ):<br><input type="checkbox"/> Gram neg intracellular diplococci <input type="checkbox"/> Gram pos diplococci <input type="checkbox"/><br>Gram neg rods <input type="checkbox"/> Yeast <input type="checkbox"/> Other, specify: _____                  |                                   |
| Culture                                             | Pathogen isolated: <input type="checkbox"/> No <input type="checkbox"/> ,Neis men <input type="checkbox"/> ,Strep Pn <input type="checkbox"/> ,Strep Aga <input type="checkbox"/> ,<br>Cypto <input type="checkbox"/> ,Other <input type="checkbox"/> specify _____                                                                                                                                                                    |                                   |
| <b>SKIN/JOINT/ASPIRATE</b> <input type="checkbox"/> | <b>Time and date of sample collection:</b><br><b>Type of sample collected:</b>                                                                                                                                                                                                                                                                                                                                                         |                                   |
| Gram stain                                          | <input type="checkbox"/> Not done <input type="checkbox"/> Pathogen observed <input type="checkbox"/> No pathogen observed<br>If pathogen observed ( <i>tick one as needed</i> ):<br><input type="checkbox"/> Gram pos <input type="checkbox"/> Gram neg <input type="checkbox"/> Rods <input type="checkbox"/> Cocci <input type="checkbox"/> Yeast<br><input type="checkbox"/> Other, specify: _____                                 |                                   |
| Culture                                             | Pathogen isolated:                                                                                                                                                                                                                                                                                                                                                                                                                     |                                   |

**Comments:** \_\_\_\_\_**Laboratory scientist:** \_\_\_\_\_ Date completion: \_\_\_/\_\_\_/\_\_\_\_\_**Final data entry:** \_\_\_\_\_ Date completion: \_\_\_/\_\_\_/\_\_\_\_\_ **Copy CRF released to Data** Date: \_\_\_/\_\_\_/\_\_\_\_\_

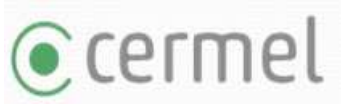

FIND – Biomarker evaluation study / HOF\_01\_P08800-00

Version 07MAR19

Participant ID: FIND 00104 \_\_/\_\_/\_\_\_\_

Place barcode label  
here

### Biobank Storage

| Samples for biobanking | Vol | Barcode ID | Freezer box name and number | position |
|------------------------|-----|------------|-----------------------------|----------|
| Urine biobanking 1     | 1ml | U001       | FIND Urine biobanking       |          |
| Urine biobanking 2     | 1ml | U002       | FIND Urine biobanking       |          |

**PS: Take samples to research laboratory freezer and attach this part of the CRF to the Research CRF.**

**Comments:** \_\_\_\_\_

**Laboratory scientist:** \_\_\_\_\_ Date completion: \_\_/\_\_/\_\_\_\_

**Final data entry:** \_\_\_\_\_ Date completion: \_\_/\_\_/\_\_\_\_

**Copy CRF released to Data** Date: \_\_/\_\_/\_\_\_\_

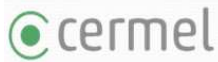

FIND – Biomarker evaluation study / AF\_01\_P08800-00  
Version 07MAR19

Participant ID: FIND 00104 \_\_\_/\_\_\_/\_\_\_

Place barcode label  
here

Investigator initials \_\_\_\_\_

### Parasitology laboratory CRF enrolment visit

**Transporter:** Please check all documents and confirm receipt of samples as requested, sign form

**Lab scientist:** Please sign form on receipt of correct samples

Tick/note the results at the appropriate place.

| INVESTIGATOR REQUEST |                          | TRANSPORTATION CHECK                                                    | BARCODE                           |                          |
|----------------------|--------------------------|-------------------------------------------------------------------------|-----------------------------------|--------------------------|
| Stool Panel          | <input type="checkbox"/> | Note: Stool sample to be split in Parasitology and sent to microbiology | STCOL001                          | <input type="checkbox"/> |
| Urinary Panel        | <input type="checkbox"/> | Urine to be sent from microbiology laboratory (if applicable)           | Patient ID (barcode not required) | <input type="checkbox"/> |
| Transported by:      |                          |                                                                         | Received by:                      |                          |

| DIARRHEAL PANEL          | Time and date of stool collection:                                                                                                                                                                                                                                                                                                                                                                                                                              |
|--------------------------|-----------------------------------------------------------------------------------------------------------------------------------------------------------------------------------------------------------------------------------------------------------------------------------------------------------------------------------------------------------------------------------------------------------------------------------------------------------------|
| Rotavirus/adenovirus RDT | <input type="checkbox"/> Adenovirus Positive <input type="checkbox"/> Rotavirus Positive <input type="checkbox"/> Negative <input type="checkbox"/> Invalid                                                                                                                                                                                                                                                                                                     |
| Appearance of faeces     | <input type="checkbox"/> Bloody <input type="checkbox"/> Rice water <input type="checkbox"/> Hard stool <input type="checkbox"/> Don't know<br><input type="checkbox"/> Watery <input type="checkbox"/> Green watery <input type="checkbox"/> Other, specify: _____                                                                                                                                                                                             |
| Microscopy               | <input type="checkbox"/> Not done <input type="checkbox"/> Pathogen observed <input type="checkbox"/> No pathogen observed<br>If pathogen observed ( <i>tick all that apply</i> ):<br><input type="checkbox"/> Ascari lumbricoids <input type="checkbox"/> Trichuris trichuria <input type="checkbox"/> strongyloides species <input type="checkbox"/><br>Hookworm species <input type="checkbox"/> protozoa spp <input type="checkbox"/> Other, specify: _____ |

| Unary PANEL | Time and date of stool collection:                                                                                                                                       |
|-------------|--------------------------------------------------------------------------------------------------------------------------------------------------------------------------|
| Microscopy  | <input type="checkbox"/> Not done <input type="checkbox"/> Pathogen confirmed <input type="checkbox"/> No pathogen observed<br>If other pathogen observed specify: _____ |

\* if suspicion of schistosomiasis

Comments: \_\_\_\_\_

Laboratory scientist name: \_\_\_\_\_

Date completion: \_\_\_/\_\_\_/\_\_\_\_\_

Final data entry: \_\_\_\_\_

Date completion: \_\_\_/\_\_\_/\_\_\_\_\_

Copy CRF sent

Date: \_\_\_/\_\_\_/\_\_\_\_\_
