# Supplementary material for: Bacterial versus non-bacterial infections: a methodology to support use-case-driven product development of diagnostics
Source: PubMed Central journal article supplement — BMJ Glob Health. 2020 Oct 21;5(10):e003141. doi: 10.1136/bmjgh-2020-003141 (PMC7580043; doi:10.1136/bmjgh-2020-003141), 2020-10-21
Supplement: bmjgh-2020-003141supp002.pdf [file bmjgh-2020-003141supp002.pdf]

## Supplementary Appendix 2

List of test panels with request criteria, sample types, and variations by site

| Panel    | Sample type      | Test                   | Brazil                                                       | Gabon                              | Malawi                                                                     |  |
|----------|------------------|------------------------|--------------------------------------------------------------|------------------------------------|----------------------------------------------------------------------------|--|
| Standard | EDTA-whole blood | Malaria                | BIOLINE Malaria Ag Pf/Pan (Alere/SD, South Korea)            |                                    |                                                                            |  |
|          |                  | HIV                    | HIV 1/2 (BIOCON)                                             | VIKIA HIV 1/2 (bioMérieux, France) | Alere Determine™ HIV-1/2 Ag/Ab Combo and Uni-Gold HIV 1/2                  |  |
|          |                  | Typhoid                | None                                                         | Blood culture                      | TyphiDot (Biodiagnostic Research Sdn. Bhd, Selangor Darul Ehsan, Malaysia) |  |
|          | EDTA-plasma      | <i>Rickettsia</i> spp. | PCR                                                          | Vircell ELISA (IgM/IgG)            |                                                                            |  |
|          |                  | <i>Leptospira</i> spp. | Microscopic agglutination test (MAT)                         | SERION VIRION ELISA (IgM/IgG)      |                                                                            |  |
|          |                  | Chikungunya virus      | PCR; Chembio DPP RDT (IgM/IgG) and EUROIMMUN ELISA (IgM/IgG) | EUROIMMUN ELISA (IgM/IgG)          |                                                                            |  |
|          |                  | Dengue virus           | PCR; Chembio DPP RDT and EUROIMMUN                           | EUROIMMUN ELISA (IgM/IgG and NS1)  |                                                                            |  |

|             |                    |                                                                |                                                                  |                                                  |                             |
|-------------|--------------------|----------------------------------------------------------------|------------------------------------------------------------------|--------------------------------------------------|-----------------------------|
|             |                    |                                                                | ELISA (IgM/IgG)                                                  |                                                  |                             |
|             |                    | Zika virus                                                     | PCR; Chembio DPP RDT and EUROIMMUN ELISA (IgM/IgG)               | EUROIMMUN ELISA (IgM/IgG)                        |                             |
| No focus    | EDTA-whole blood   | Syphilis                                                       | Syphilis test SD Bioline 3.0 (Alere/SD, South Korea)             |                                                  |                             |
|             |                    | Cryptococcus                                                   | CrAg LFA, (IMMY, USA)                                            |                                                  |                             |
| Respiratory | Oropharyngeal swab | Group A <i>Streptococcus</i> RDT                               | In-Line Strep A test (Quidel, USA)                               |                                                  |                             |
|             | Oropharyngeal swab | Multiplex PCR for respiratory pathogens                        | Fast Track Diagnostics Respiratory Pathogens 21                  | Seegene Allplex™ Respiratory Panel Assays 1 to 4 |                             |
|             | Urine              | Rapid urinary antigen test for <i>Streptococcus pneumoniae</i> | BinaxNOW® <i>S. pneumoniae</i> Antigen Card (Alere, South Korea) |                                                  |                             |
| Stool       | Stool              | Rotavirus and adenovirus                                       | VIKIA (BioMerieux, France)                                       |                                                  |                             |
| Urinary     | Urine              | Dipstick, white blood cells, and protein                       | Urilab H10 (Urilab Systems-                                      | Combur 10-Test (Roche                            | Urilab H10 (Urilab Systems- |

|                              |                        |              | Diagnostics,<br>India) | Diagnostics,<br>Switzerland) | Diagnostics,<br>India) |
|------------------------------|------------------------|--------------|------------------------|------------------------------|------------------------|
| Central<br>nervous<br>system | Cerebrospinal<br>fluid | Cryptococcus | CrAg LFA, (IMMY, USA)  |                              |                        |

**Abbreviations** RDT: rapid diagnostic test; PCR: polymerase chain reaction; ELISA: enzyme-linked immunosorbent assay; IgM: immunoglobulin M; IgG: immunoglobulin G; NS1: non-structural protein 1; MAT: microscopic agglutination test
