# Supplementary material for: Bacterial versus non-bacterial infections: a methodology to support use-case-driven product development of diagnostics
Source: PubMed Central journal article supplement — BMJ Glob Health. 2020 Oct 21;5(10):e003141. doi: 10.1136/bmjgh-2020-003141 (PMC7580043; doi:10.1136/bmjgh-2020-003141), 2020-10-21
Supplement: bmjgh-2020-003141supp003.pdf [file bmjgh-2020-003141supp003.pdf]

**Supplementary Appendix 3****List of samples collected and relevant transport and storage conditions**

| <b>Specimen</b>                       | <b>Transport</b> | <b>Temperature</b> | <b>Time from collection to storage or testing</b> | <b>Purpose</b>                         |
|---------------------------------------|------------------|--------------------|---------------------------------------------------|----------------------------------------|
| Whole blood in an EDTA tube           | Local Courier    | 8°C                | Max 8 hrs                                         | Local testing and long-term storage    |
| Whole blood in an RNA PAXgene tube    | Local Courier    | 8°C                | 2 hrs                                             | Aliquoting and storage                 |
| Whole blood in a plain tube           | Local Courier    | 8°C                | Max 8 hrs                                         | Local testing, long-term serum storage |
| Whole blood in a lithium heparin tube | Local Courier    | 8°C                | Exactly 60 mins                                   | Activation of HNL                      |
| Aliquoted serum                       | World Courier    | -20°C              | Max 8 hrs                                         | Local serology testing                 |
|                                       | World Courier    | -80°C              | Max 8 hrs                                         | Specimen bank                          |
| Aliquoted plasma                      | World Courier    | -20°C              | Max 8 hrs from collection                         | Local serology testing                 |
|                                       | World Courier    | -80°C              | Max 8 hrs from collection                         | Specimen bank                          |

|                             |                        |                                  |                                               |                     |
|-----------------------------|------------------------|----------------------------------|-----------------------------------------------|---------------------|
| Activated heparin plasma    |                        | -20°C                            | Directly after activation                     | Local ELISA testing |
|                             | World Courier          | -80°C                            | Directly after activation                     | Specimen bank       |
| PAXgene RNase-free aliquots | World Courier          | -80°C, RNase-free cryotubes      | 10 × 1 ml aliquots after incubation for 2 hrs | Specimen bank       |
| Urine                       | Local Courier          | 4-8°C                            | Max 4 hrs                                     | Local testing       |
|                             | World Courier          | -80°C                            | Max 4 hrs                                     | Specimen bank       |
| Stool                       | Local Courier          | 4-8°C                            | Max 4 hrs                                     | Local testing       |
| Aspirate                    | Local Courier          | 4-8°C                            | Max 4 hrs                                     | Local testing       |
| Cerebrospinal fluid         | Priority Local Courier | Ambient temperature              | Max 4 hrs                                     | Local testing       |
| Oropharyngeal swab          | Local Courier          | 8°C                              | Max 4 hrs                                     | Local testing       |
|                             | World Courier          | -20°C, stored in transport media | Max 4 hrs                                     | Reference testing   |
