# Supplementary material for: Bacterial versus non-bacterial infections: a methodology to support use-case-driven product development of diagnostics
Source: PubMed Central journal article supplement — BMJ Glob Health. 2020 Oct 21;5(10):e003141. doi: 10.1136/bmjgh-2020-003141 (PMC7580043; doi:10.1136/bmjgh-2020-003141), 2020-10-21
Supplement: bmjgh-2020-003141supp004.pdf [file bmjgh-2020-003141supp004.pdf]

# Patient report for FE001010893

*FIND*

23 January 2019

## 1. Clinical Data

### Demographic Information

- Age: 59
- Gender: Male

### Symptoms

- Fever duration: 2 days
- Other symptoms: Headache, Joint pain or swelling

### Vaccination History

- Vaccination status: Completed vaccination

### Physical Examination

#### Vital signs measurement

- Temperature: 37.9°C
- Respiratory rate: 24pm
- Pulse rate: 103pm
- Blood pressure: 136/77

#### Anthropometry

- Weight: 54kg
- Height: 168cm
- Mid upper arm circumference: 250mm
- Peripheral signs of malnutrition: No sign

#### Treatment prescribed:

- Treatment: Antibiotics: CIPROFLAXIN - Other

## 2. Laboratory Data

### Standard Panel

- RDT results: Malaria RDT negative, HIV RDT negative, Typhoid IgM RDT positive
- Whole White Blood Cell count( $10^3$ /ul): 11.1 - Neutrophil (% of WBC): 67.568 - Lymphocyte (% of WBC): 26.126 - Hematocrit (% of Whole Red Blood Cell count): 43.6

### Serology results by ELISA

#### Chikungunya

- Baseline sample: IgG Positive
- Baseline sample: IgM Negative

**Dengue**

- Baseline sample: NS1-Antigen Negative
- Baseline sample: IgG Positive
- Baseline sample: IgM Negative

**Leptospirosis**

- Baseline sample: IgG Negative
- Baseline sample: IgM Negative
- Follow-up sample IgG Negative
- Follow-up sample IgM Negative

**Rickettsia**

- Baseline sample: IgG Positive
- Baseline sample: IgM Negative
- Follow-up sample IgG Negative
- Follow-up sample IgM Negative

**Zika**

- Baseline sample: IgG Positive
- Baseline sample: IgM Negative

**3. Follow-up Data****Treatment at Follow-up****Antibiotics**

- Antibiotics: Yes
- Start date: 2018-03-22
- End date: 2018-03-26
- Cured: Yes

**Final clinical diagnosis**

Presumptive diagnosis: Viral Inf
