# Supplementary material for: Bacterial versus non-bacterial infections: a methodology to support use-case-driven product development of diagnostics
Source: PubMed Central journal article supplement — BMJ Glob Health. 2020 Oct 21;5(10):e003141. doi: 10.1136/bmjgh-2020-003141 (PMC7580043; doi:10.1136/bmjgh-2020-003141), 2020-10-21
Supplement: bmjgh-2020-003141supp005.pdf [file bmjgh-2020-003141supp005.pdf]

## Supplementary Appendix 5

Initial list of selected biomarkers to be evaluated

| <b>Biomarker</b>    | <b>Assay (Manufacturer)</b>                                                | <b>Sample</b>                          | <b>Reference</b>                            |
|---------------------|----------------------------------------------------------------------------|----------------------------------------|---------------------------------------------|
| HNL                 | HNL ELISA prototype (Philips/University of Uppsala)                        | Activated heparin plasma               | Venge <i>et al.</i> , 2015 <sup>1</sup>     |
| MxA + CRP           | FebriDx <sup>®</sup> (RPS Diagnostics)                                     | Fresh EDTA-whole blood via fingerprick | Sambursky <i>et al.</i> , 2015 <sup>2</sup> |
| CRP + TRAIL + IL-10 | ImmunoDx or ImmunoXpert (MeMed) (offsite using bio-banked samples in 2018) | EDTA-plasma                            | Oved <i>et al.</i> , 2015 <sup>3</sup>      |
| CHI3L1              | ELISA (R&D Systems)                                                        | EDTA-plasma                            | Erdman <i>et al.</i> , 2015 <sup>4</sup>    |
| HBP                 | ELISA (Axis-Shield)                                                        | EDTA-plasma                            | Kapasi <i>et al.</i> , 2016 <sup>5</sup>    |
| CRP                 | CRP NycoCard with NycoReader II (Alere)                                    | EDTA-plasma                            | n.a.                                        |
| PCT                 | ELISA (Abcam)                                                              | EDTA-plasma                            | n.a.                                        |

n.a., not applicable

## References

1. Venge P, Douhan-Hakansson L, Garwicz D, et al. Human Neutrophil Lipocalin as a Superior Diagnostic Means To Distinguish between Acute Bacterial and Viral Infections. *Clin Vaccine Immunol* 2015;22(9):1025-32. doi: 10.1128/cvi.00347-15 [published Online First: 2015/07/03]
2. Sambursky R, Shapiro N. Evaluation of a combined MxA and CRP point-of-care immunoassay to identify viral and/or bacterial immune response in patients with acute febrile respiratory infection. *Eur Clin Respir J* 2015;2:28245. doi: 10.3402/ecrj.v2.28245 [published Online First: 2015/12/18]
3. Oved K, Cohen A, Boico O, et al. A novel host-proteome signature for distinguishing between acute bacterial and viral infections. *PLoS one* 2015;10(3):e0120012. doi: 10.1371/journal.pone.0120012 [published Online First: 2015/03/19]
4. Erdman LK, D'Acremont V, Hayford K, et al. Biomarkers of Host Response Predict Primary End-Point Radiological Pneumonia in Tanzanian Children with Clinical Pneumonia: A Prospective Cohort Study. *PLoS one* 2015;10(9):e0137592. doi: 10.1371/journal.pone.0137592 [published Online First: 2015/09/15]
5. Kapasi AJ, Dittrich S, Gonzalez IJ, et al. Host Biomarkers for Distinguishing Bacterial from Non-Bacterial Causes of Acute Febrile Illness: A Comprehensive Review. *PLoS one* 2016;11(8):e0160278. doi: 10.1371/journal.pone.0160278 [published Online First: 2016/08/04]
